# Supplementary material for: Vortioxetine Prevents Lipopolysaccharide-Induced Memory Impairment Without Inhibiting the Initial Inflammatory Cascade
Source: PubMed Central journal article supplement (PMC7890663; doi:10.3389/fphar.2020.603979), 2021-02-04
Supplement: datasheet1.pdf [file datasheet1.pdf]

### Supplementary Material

**Supplementary Table 1:** Nucleotide sequence of the forward and reverse primers used for Real-Time PCR.

| Target name                    | Primer Sequence (5' -3')   | Gene Bank Number |
|--------------------------------|----------------------------|------------------|
| <i>TNF-<math>\alpha</math></i> | Fw GGCCTCCCTCTCATCAGTTC    | NM_013693.3      |
|                                | Rv CACTTGGTGGTTTGCTACGA    |                  |
| <i>IL-1<math>\beta</math></i>  | Fw TGAAAGCTCTCCACCTCAATG   | NM_008361.4      |
|                                | Rv CCAAGGCCACAGGTATTTTG    |                  |
| <i>IL-6</i>                    | Fw CTCACAAGTCGGAGGCTTA     | NM_031168.2      |
|                                | Rv CAAGTGCATCATCGTTGTTT    |                  |
| <i>IDO1</i>                    | Fw TGCAGACTGTGTCTGGCAAACCT | NM_008324.2      |
|                                | Rv GCCCTTGTCGCAGTCCCCAC    |                  |
| <i>CD14</i>                    | Fw AGATGTGGAATTGTACGGCG    | NM_009841.4      |
|                                | Rv CGTAAGCCGCTTTAAGGACA    |                  |
| <i>CD86</i>                    | Fw GTAGACGTGTTCCAGAACTTA   | NM_019388.3      |
|                                | Rv TGTTTTGAGCCTTTGTAAAT    |                  |
| <i>CD11b</i>                   | Fw ACGCCATCTACATGATTGTCAC  | NM_001082960.1   |
|                                | Rv AAGACTACACTGACAGGGAGGC  |                  |
| <i>IL-4</i>                    | Fw CCAAGGTGCTTCGCATATTT    | NM_021283.2      |
|                                | Rv ATCGAAAAGCCCGAAAGAGT    |                  |
| <i>TGF-<math>\beta</math>1</i> | Fw CAAGGGCTACCATGCCAACTT   | NM_011577.2      |
|                                | Rv GTTGTGTTGGTTGTAGAGGGC   |                  |
| <i>IL-1Ra</i>                  | Fw AAGCCTTCAGAATCTGGGATAC  | NM_031167.5      |
|                                | Rv TCATCTCCAGACTTGGCACA    |                  |
| <i>CD206</i>                   | Fw CAAGGAAGGTTGGCATTGT     | NM_008625.2      |
|                                | Rv CCTTTCAGTCCTTTGCAAGT    |                  |
| <i>Arg1</i>                    | Fw CTCCAAGCCAAAGTCCTTAGAG  | NM_007482.3      |
|                                | Rv AGGAGCTGTCATTAGGGACATC  |                  |
| <i>CypA</i>                    | Fw AGCATAAGGTCCTGGCATC     | NM_008907.2      |
|                                | Rv TTCACCTTCCCAAAGACCAC    |                  |

**Supplementary Table 2: Summary of the statistical analysis for the behavioural data**

Mice receiving standard or VTX enriched diet for 4 weeks received an intraperitoneal injection of either LPS or saline. Six hours after LPS or vehicle injection feeding, body weight, behaviour in the open field and serum corticosterone levels were evaluated, while 24 hours after the immune challenge we assessed behaviour in the open field, sucrose preference and performance in the novel object recognition test. Data were analyzed with a two-factor (diet x LPS) analysis of variance (ANOVA); \*  $p < 0.05$ ; \*\*  $p < 0.01$ , \*\*\*  $p < 0.001$

| Parameter                       |                              | Univariate ANOVA                      | Main effects                           |                                   | Interaction                       |                                   |
|---------------------------------|------------------------------|---------------------------------------|----------------------------------------|-----------------------------------|-----------------------------------|-----------------------------------|
|                                 |                              |                                       | LPS                                    | DIET                              | LPS*DIET                          |                                   |
| LPS effect (6 hours)            | Body weight                  | **<br>$p = 0.001$<br>F(3;43)=6.402    | ***<br>$p < 0.0001$<br>F(1;43)=18.683  | ↔<br>$p = 0.379$<br>F(1;43)=0.541 | ↔<br>$p = 0.959$<br>F(1;43)=0.003 |                                   |
|                                 | Food intake                  | ↔<br>$p = 0.056$<br>F(3;43)=2.729     | *<br>$p = 0.013$<br>F(1;43)=6.687      | ↔<br>$p = 0.348$<br>F(1;43)=0.900 | ↔<br>$p = 0.467$<br>F(1;43)=0.539 |                                   |
| Open field (6 hours after LPS)  | Total distance (whole arena) | ***<br>$p < 0.0001$<br>F(3;41)=26.850 | ***<br>$p < 0.0001$<br>F(1;41)=62.805  | ↔<br>$p = 0.074$<br>F(1;41)=3.415 | ↔<br>$p = 0.114$<br>F(1;41)=2.642 |                                   |
|                                 | Rearings                     | ***<br>$p < 0.0001$<br>F(3;41)=18.284 | ***<br>$p < 0.0001$<br>F(1;41)=47.596  | ↔<br>$p = 0.786$<br>F(1;41)=0.087 | ↔<br>$p = 0.092$<br>F(1;41)=2.975 |                                   |
|                                 | Total resting time           | ***<br>$p < 0.0001$<br>F(3;43)=14.121 | ***<br>$p < 0.0001$<br>F(1;43)=34.124  | ↔<br>$p = 0.490$<br>F(1;43)=0.489 | ↔<br>$p = 0.443$<br>F(1;43)=0.606 |                                   |
|                                 | Percent Time in the center   | *<br>$p = 0.033$<br>F(3;41)=3.207     | ↔<br>$p = 0.077$<br>F(1;41)=3.330      | ↔<br>$p = 0.179$<br>F(1;41)=1.884 | ↔<br>$p = 0.666$<br>F(1;41)=0.189 |                                   |
| Serum corticosterone            |                              | ***<br>$p < 0.0001$<br>F(3;42)=51.098 | ***<br>$p < 0.0001$<br>F(1;42)=153.023 | ↔<br>$p = 0.810$<br>F(1;42)=0.056 | ↔<br>$p = 0.322$<br>F(1;42)=1.000 |                                   |
| SPT                             | Sucrose preference 24 hours  | **<br>$p = 0.010$<br>F(3;37)=4.479    | ***<br>$p = 0.001$<br>F(1;37)=12.718   | ↔<br>$p = 0.351$<br>F(1;37)=0.896 | ↔<br>$p = 0.636$<br>F(1;37)=0.228 |                                   |
|                                 | Liquid intake 24 hours       | ↔<br>$p = 0.397$<br>F(3;43)=1.013     | ↔<br>$p = 0.993$<br>F(1;43)=0.000      | ↔<br>$p = 0.162$<br>F(1;43)=2.030 | ↔<br>$p = 0.322$<br>F(1;43)=1.005 |                                   |
| Open field (24 hours after LPS) | Total distance (whole arena) | ↔<br>$p = 0.651$<br>F(3;43)=0.550     | ↔<br>$p = 0.961$<br>F(1;43)=0.002      | ↔<br>$p = 0.112$<br>F(1;43)=2.672 | ↔<br>$p = 0.998$<br>F(1;43)=0.000 |                                   |
|                                 | Rearings                     | ↔<br>$p = 0.191$<br>F(3;41)=1.656     | ↔<br>$p = 0.198$<br>F(1;41)=1.712      | ↔<br>$p = 0.164$<br>F(1;41)=2.013 | ↔<br>$p = 0.887$<br>F(1;41)=0.024 |                                   |
|                                 | Total resting time           | ↔<br>$p = 0.954$<br>F(3;43)=0.110     | ↔<br>$p = 0.843$<br>F(1;43)=0.40       | ↔<br>$p = 0.741$<br>F(1;43)=0.111 | ↔<br>$p = 0.678$<br>F(1;43)=0.117 |                                   |
|                                 | Percent Time in the center   | ↔<br>$p = 0.323$<br>F(3;43)=1.198     | ↔<br>$p = 0.172$<br>F(1;43)=1.946      | ↔<br>$p = 0.776$<br>F(1;43)=0.082 | ↔<br>$p = 0.207$<br>F(1;43)=1.653 |                                   |
| NORT                            | Training                     | Total interaction                     | ↔<br>$p = 0.839$<br>F(3;43)=0.280      | ↔<br>$p = 0.743$<br>F(1;43)=0.109 | ↔<br>$p = 0.829$<br>F(1;43)=0.050 | ↔<br>$p = 0.409$<br>F(1;43)=0.697 |
|                                 |                              | Total distance travelled              | ↔<br>$p = 0.120$<br>F(3;43)=2.067      | ↔<br>$p = 0.179$<br>F(1;43)=1.870 | ↔<br>$p = 0.204$<br>F(1;43)=1.670 | ↔<br>$p = 0.111$<br>F(1;43)=2.059 |
|                                 |                              | Total exploring time                  | ↔<br>$p = 0.256$<br>F(3;43)=1.401      | ↔<br>$p = 0.190$<br>F(1;44)=1.774 | ↔<br>$p = 0.929$<br>F(1;44)=0.008 | ↔<br>$p = 0.137$<br>F(1;44)=2.299 |
|                                 | Test                         | Total interaction                     | ↔<br>$p = 0.340$<br>F(3;43)=1.151      | ↔<br>$p = 0.090$<br>F(1;43)=3.014 | ↔<br>$p = 0.189$<br>F(1;43)=0.666 | ↔<br>$p = 0.550$<br>F(1;43)=0.363 |
|                                 |                              | Total distance travelled              | ↔<br>$p = 0.275$<br>F(3;43)=1.338      | ↔<br>$p = 0.140$<br>F(1;43)=2.262 | ↔<br>$p = 0.198$<br>F(1;43)=1.711 | ↔<br>$p = 0.679$<br>F(1;43)=0.173 |
|                                 |                              | Total exploring time                  | ↔<br>$p = 0.624$<br>F(3;43)=0.586      | ↔<br>$p = 0.203$<br>F(1;44)=1.670 | ↔<br>$p = 0.859$<br>F(1;44)=0.032 | ↔<br>$p = 0.850$<br>F(1;44)=0.036 |

**Supplementary Table 3: Summary of statistical analysis for gene expression results in the dorsal and ventral hippocampus in animals chronically fed with standard diet or VTX-enriched diet sacrificed 6 hours after receiving LPS or saline.**

Expression levels of mRNAs coding for pro-inflammatory cytokines (*TNF- $\alpha$* , *IL-1 $\beta$*  and *IL-6*), *IDO1*, markers of activated microglia (*CD14*, *CD86* and *CD11b*), anti-inflammatory cytokines (*IL-4* and *TGF- $\beta$ 1*), cytokine antagonist (*IL-1Ra*) or markers of microglia M2 phenotype (*CD206* and *Arg1*) in the dorsal hippocampus or in the ventral hippocampus were evaluated using Real Time PCR. Mice receiving standard or VTX enriched diet for 4 weeks were sacrificed 6 hours after an intraperitoneal injection of either LPS or saline. The mRNA levels were normalized to the endogenous control, cyclophilin A. For a quantitative evaluation of change comparative  $\Delta\Delta Ct$  method was performed using as calibrator, average of saline control animals. Data were analyzed with a two-factor (diet x LPS) analysis of variance (ANOVA); \*  $p < 0.05$ ; \*\*  $p < 0.01$ , \*\*\*  $p < 0.001$

| TARGETS                        | Dorsal hippocampus                                |                                                   |                                                   |                                                   | Ventral hippocampus                               |                                                   |                                                   |                                                   |
|--------------------------------|---------------------------------------------------|---------------------------------------------------|---------------------------------------------------|---------------------------------------------------|---------------------------------------------------|---------------------------------------------------|---------------------------------------------------|---------------------------------------------------|
|                                | Univariate ANOVA                                  | Main effects                                      |                                                   | Interaction                                       | Univariate ANOVA                                  | Main effects                                      |                                                   | Interaction                                       |
|                                |                                                   | LPS                                               | DIET                                              |                                                   |                                                   | LPS*DIET                                          | LPS                                               |                                                   |
| <i>TNF-<math>\alpha</math></i> | ***<br>$p < 0.0001$<br>F(3;36)=32.403             | ***<br>$p < 0.0001$<br>F(1;36)=96.822             | $\leftrightarrow$<br>$p = 0.417$<br>F(1;36)=0.674 | $\leftrightarrow$<br>$p = 0.244$<br>F(1;36)=1.407 | ***<br>$p < 0.0001$<br>F(3;37)=30.529             | ***<br>$p < 0.0001$<br>F(1;37)=88.535             | $\leftrightarrow$<br>$p = 0.202$<br>F(1;37)=1.690 | $\leftrightarrow$<br>$p = 0.106$<br>F(1;37)=2.757 |
| <i>IL-1<math>\beta</math></i>  | ***<br>$p < 0.0001$<br>F(3;35)=21.581             | ***<br>$p < 0.0001$<br>F(1;35)=43.759             | $\leftrightarrow$<br>$p = 0.382$<br>F(1;35)=0.785 | $\leftrightarrow$<br>$p = 0.886$<br>F(1;35)=0.021 | ***<br>$p < 0.0001$<br>F(3;36)=11.637             | ***<br>$p < 0.0001$<br>F(1;36)=23.375             | **<br>$p = 0.005$<br>F(1;36)=9.119                | **<br>$p = 0.094$<br>F(1;36)=2.973                |
| <i>IL-6</i>                    | **<br>$p = 0.004$<br>F(3;36)=5.242                | ***<br>$p = 0.001$<br>F(1;36)=14.046              | $\leftrightarrow$<br>$p = 0.695$<br>F(1;36)=0.157 | $\leftrightarrow$<br>$p = 0.250$<br>F(1;36)=1.373 | **<br>$p = 0.004$<br>F(3;37)=5.296                | **<br>$p = 0.001$<br>F(1;37)=13.547               | **<br>$p = 0.299$<br>F(1;37)=1.111                | $\leftrightarrow$<br>$p = 0.133$<br>F(1;37)=2.367 |
| <i>IDO1</i>                    | ***<br>$p < 0.0001$<br>F(3;36)=16.250             | ***<br>$p < 0.0001$<br>F(1;36)=33.931             | $\leftrightarrow$<br>$p = 0.212$<br>F(1;36)=1.623 | ***<br>$p = 0.001$<br>F(1;36)=12.669              | ***<br>$p < 0.0001$<br>F(3;36)=15.803             | ***<br>$p < 0.0001$<br>F(1;36)=42.075             | $\leftrightarrow$<br>$p = 0.182$<br>F(1;36)=1.862 | $\leftrightarrow$<br>$p = 0.062$<br>F(1;36)=3.742 |
| <i>CD14</i>                    | ***<br>$p < 0.0001$<br>F(3;37)=23.949             | ***<br>$p < 0.0001$<br>F(1;37)=61.357             | $\leftrightarrow$<br>$p = 0.053$<br>F(1;37)=4.030 | *<br>$p = 0.012$<br>F(1;37)=6.991                 | ***<br>$p < 0.0001$<br>F(3;36)=25.943             | ***<br>$p < 0.0001$<br>F(1;36)=75.758             | $\leftrightarrow$<br>$p = 0.108$<br>F(1;36)=2.726 | $\leftrightarrow$<br>$p = 0.245$<br>F(1;36)=1.403 |
| <i>CD86</i>                    | ***<br>$p < 0.0001$<br>F(3;37)=8.023              | ***<br>$p = 0.001$<br>F(1;37)=14.777              | $\leftrightarrow$<br>$p = 0.206$<br>F(1;37)=1.661 | *<br>$p = 0.011$<br>F(1;37)=7.240                 | ***<br>$p < 0.0001$<br>F(3;37)=13.414             | ***<br>$p < 0.0001$<br>F(1;37)=27.468             | **<br>$p = 0.005$<br>F(1;37)=8.862                | **<br>$p = 0.008$<br>F(1;37)=7.958                |
| <i>CD11b</i>                   | **<br>$p = 0.001$<br>F(3;38)=7.352                | $\leftrightarrow$<br>$p = 0.395$<br>F(1;38)=0.743 | **<br>$p = 0.004$<br>F(1;38)=9.296                | **<br>$p = 0.002$<br>F(1;38)=11.456               | **<br>$p = 0.007$<br>F(3;36)=4.858                | $\leftrightarrow$<br>$p = 0.095$<br>F(1;36)=2.957 | * $p = 0.038$<br>F(1;36)=4.682                    | * $p = 0.012$<br>F(1;36)=7.047                    |
| <i>IL-4</i>                    | ***<br>$p < 0.0001$<br>F(3;35)=15.915             | ***<br>$p < 0.0001$<br>F(1;35)=32.073             | **<br>$p = 0.003$<br>F(1;35)=10.171               | **<br>$p = 0.005$<br>F(1;35)=9.244                | ***<br>$p < 0.0001$<br>F(3;35)=19.079             | ***<br>$p < 0.0001$<br>F(1;35)=31.216             | ***<br>$p < 0.0001$<br>F(1;35)=21.087             | **<br>$p = 0.006$<br>F(1;35)=8.493                |
| <i>TGF-<math>\beta</math>1</i> | ***<br>$p < 0.0001$<br>F(3;36)=21.690             | ***<br>$p < 0.0001$<br>F(1;36)=54.109             | $\leftrightarrow$<br>$p = 0.990$<br>F(1;36)=0     | **<br>$p = 0.004$<br>F(1;36)=9.674                | ***<br>$p < 0.0001$<br>F(3;37)=27.557             | ***<br>$p < 0.0001$<br>F(1;37)=79.776             | $\leftrightarrow$<br>$p = 0.351$<br>F(1;37)=0.895 | $\leftrightarrow$<br>$p = 0.182$<br>F(1;37)=1.855 |
| <i>IL-1Ra</i>                  | ***<br>$p < 0.0001$<br>F(3;35)=27.511             | ***<br>$p < 0.0001$<br>F(1;35)=81.799             | $\leftrightarrow$<br>$p = 0.346$<br>F(1;35)=0.561 | $\leftrightarrow$<br>$p = 0.387$<br>F(1;35)=0.538 | ***<br>$p < 0.0001$<br>F(3;35)=8.887              | ***<br>$p < 0.0001$<br>F(1;35)=28.880             | $\leftrightarrow$<br>$p = 0.160$<br>F(1;35)=2.065 | $\leftrightarrow$<br>$p = 0.155$<br>F(1;35)=2.126 |
| <i>CD206</i>                   | **<br>$p = 0.001$<br>F(3;37)=7.364                | ***<br>$p < 0.0001$<br>F(1;37)=19.486             | $\leftrightarrow$<br>$p = 0.431$<br>F(1;37)=0.636 | $\leftrightarrow$<br>$p = 0.223$<br>F(1;37)=1.543 | ***<br>$p < 0.0001$<br>F(3;35)=11.953             | ***<br>$p < 0.0001$<br>F(1;35)= 35.76             | $\leftrightarrow$<br>$p = 0.809$<br>F(1;35)=0.059 | $\leftrightarrow$<br>$p = 0.841$<br>F(1;35)=0.041 |
| <i>Arg1</i>                    | $\leftrightarrow$<br>$p = 0.327$<br>F(3;37)=1.192 | $\leftrightarrow$<br>$p = 0.944$<br>F(1;37)=0.005 | $\leftrightarrow$<br>$p = 0.610$<br>F(1;37)=0.265 | $\leftrightarrow$<br>$p = 0.078$<br>F(1;37)=3.309 | $\leftrightarrow$<br>$p = 0.380$<br>F(3;37)=1.057 | $\leftrightarrow$<br>$p = 0.308$<br>F(1;37)=1.072 | $\leftrightarrow$<br>$p = 0.581$<br>F(1;37)=0.311 | $\leftrightarrow$<br>$p = 0.183$<br>F(1;37)=1.845 |

**Supplementary result: food and water consumption during a 28-day dietary administration of vortioxetine or standard diet**

During the experimental period we monitored food and water consumption. No gross changes in animal's feeding and drinking behavior were found. Fluctuations were observed in food intake at day 11, where VORT-receiving animals ate more than CTRL ( $t=-2.467$ ;  $p=0.022$ ), and at day 28, when the opposite happened ( $t=2.510$ ;  $p=0.031$ ). As for water consumption, there were no significant differences between groups during the course of the experiment. On the 29<sup>th</sup> day, before receiving either LPS or saline, no difference was found in food and water consumption between mice treated chronically with vortioxetine and those fed with standard diet.

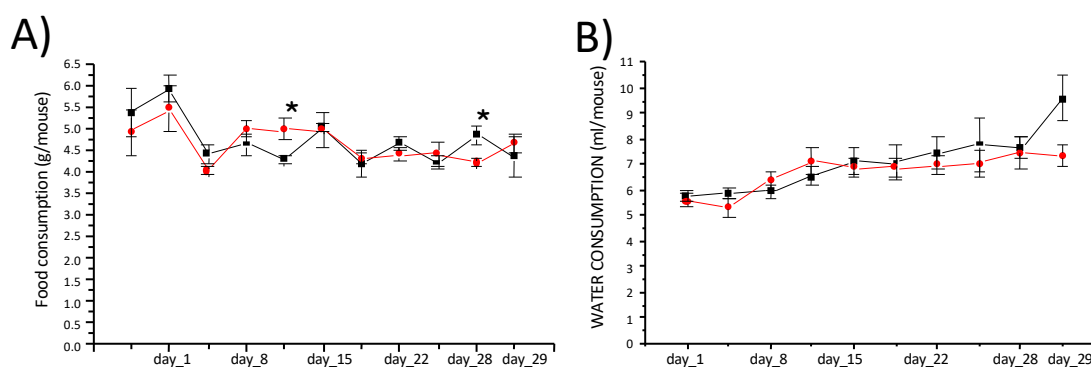

**Supplementary figure 1: Food intake (A) and water consumption (B) in male C57BL6/J mice receiving either standard diet or chronic dietary administration of vortioxetine for 4 weeks. n= 43-44 mice per group. Data are represented as means  $\pm$  S.E.M. and were analysed with t-test (standard diet ■ vs VTX-enriched diet ●) \* $p < 0.05$  vs standard diet.**

## Supplementary figure 2

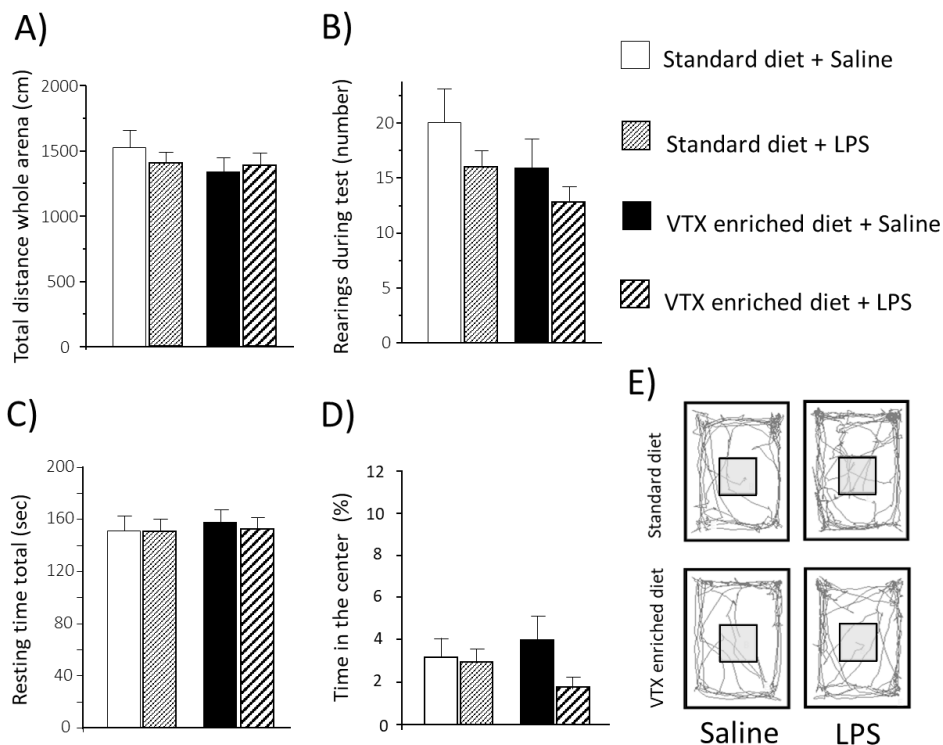

**Supplementary figure 2:** 24 hours after LPS/saline injection, animals did not display any alteration in locomotor activity or anxiety-like behavior, irrespective of the diet they received before the immune challenge. Histograms represent the behaviors in the open field test. (A) Total distance travelled (cm) in the entire open field area. (B) Number of rearing during test. (C) Resting time during test. (D) Percent time spent in the center of the open field. (E) Representative movement traces of all groups in the open field. Treatment as indicated in the legend,  $n = 12$  mice per group. Data are represented as means  $\pm$  S.E.M.
